# Supplementary material
Source: PubMed Central journal article supplement (PMC5038050)
Supplement: AEM.01192-16_zam999117402so1.pdf [file AEM.01192-16_zam999117402so1.pdf]

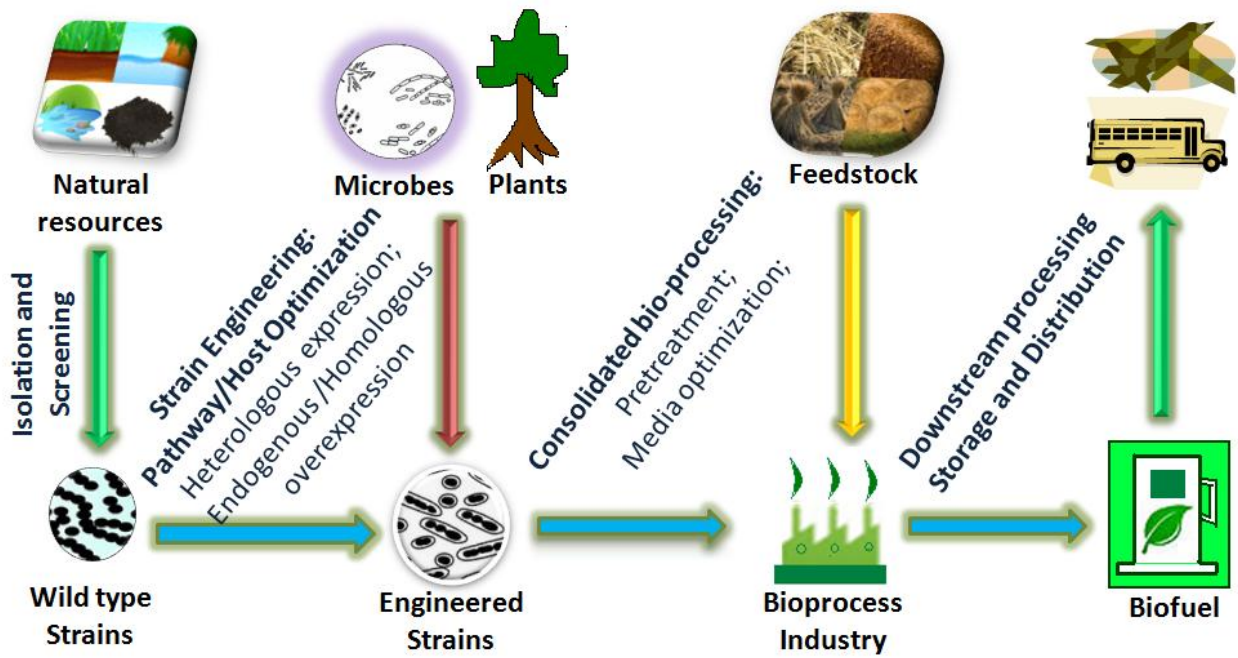

FIG. S1. Production of biofuels from microbes. Metabolic engineering of microbial host and process optimization enhance the production of biofuels and fuel precursors from feedstock.
